# Supplementary material for: Reporting quality in preclinical animal experimental research in 2009 and 2018: A nationwide systematic investigation
Source: PLoS One. 2022 Nov 3;17(11):e0275962. doi: 10.1371/journal.pone.0275962 (PMC9632797; doi:10.1371/journal.pone.0275962)
Supplement: S3 File — (XLSX) [file pone.0275962.s003.xlsx]

## Sheet: AgreementRaw
			Count								Percentages
Excel Collumn	criteria	n	KJagree	KCagree	JCagree	JhKh	JhKl	JlKh	JlKl		KJagree	KCagree	JCagree	JhKh	JhKl	JlKh	JlKl	agree	disagree	expected	kappa
C	Sample size calculation	500	491	494	495	468	8	1	23		0.982	0.988	0.99	0.936	0.016	0.002	0.046	0.982	0.018	0.895952	0.827003
F	Sample size	500	449	483	466	192	29	22	257		0.898	0.966	0.932	0.384	0.058	0.044	0.514	0.898	0.102	0.508352	0.792534
I	Randomization	500	482	496	486	330	6	12	152		0.964	0.992	0.972	0.66	0.012	0.024	0.304	0.964	0.036	0.563296	0.917564
L	Randomization method	500	493	495	498	482	2	5	11		0.986	0.99	0.996	0.964	0.004	0.01	0.022	0.986	0.014	0.943664	0.751491
O	Blinded experiment conduction	500	487	491	492	481	8	5	6		0.974	0.982	0.984	0.962	0.016	0.01	0.012	0.974	0.026	0.951232	0.466864
R	Blinded outcome assessment	500	481	488	491	346	9	10	135		0.962	0.976	0.982	0.692	0.018	0.02	0.27	0.962	0.038	0.58904	0.907534
U	Attrition I	500	414	471	441	297	43	43	117		0.828	0.942	0.882	0.594	0.086	0.086	0.234	0.828	0.172	0.5648	0.604779
X	Attrition II	500	468	484	482	447	15	17	21		0.936	0.968	0.964	0.894	0.03	0.034	0.042	0.936	0.064	0.862944	0.533038
AA	Exclusions	500	470	490	480	397	19	11	73		0.94	0.98	0.96	0.794	0.038	0.022	0.146	0.94	0.06	0.709824	0.793229
AD	Health status	500	469	487	482	427	17	14	42		0.938	0.974	0.964	0.854	0.034	0.028	0.084	0.938	0.062	0.796432	0.695433
AG	Health status and detailed information	500	499	500	499	499	1	0	0		0.998	1	0.998	0.998	0.002	0	0	0.998	0.002	0.998	0
AY	Conflicts of interest	500	494	498	496	180	4	2	314		0.988	0.996	0.992	0.36	0.008	0.004	0.628	0.988	0.012	0.535904	0.974143
